# Supplementary material
Source: PubMed Central journal article supplement (PMC6681648)
Supplement: NIHMS1042955-supplement-1.pdf [file NIHMS1042955-supplement-1.pdf]

Materials List for:

# Longitudinal Morphological and Physiological Monitoring of Three-dimensional Tumor Spheroids Using Optical Coherence Tomography

Yongyang Huang<sup>1</sup>, Jinyun Zou<sup>1</sup>, Mudabbir Badar<sup>1</sup>, Junchao Liu<sup>1</sup>, Wentao Shi<sup>2</sup>, Shunqiang Wang<sup>2</sup>, Qiongyu Guo<sup>3</sup>, Xiaofang Wang<sup>1</sup>, Sarah Kessel<sup>4</sup>, Leo Li-Ying Chan<sup>4</sup>, Peter Li<sup>4</sup>, Yaling Liu<sup>2</sup>, Jean Qiu<sup>4</sup>, Chao Zhou<sup>1,5,6</sup>

<sup>1</sup>Department of Electrical and Computer Engineering, Lehigh University

<sup>2</sup>Department of Mechanical Engineering, Lehigh University

<sup>3</sup>Department of Biomedical Engineering, Southern University of Science and Technology

<sup>4</sup>Department of Technology R&D, Nexcelom Bioscience LLC

<sup>5</sup>Department of Bioengineering, Lehigh University

<sup>6</sup>Center for Photonics and Nanoelectronics, Lehigh University

Correspondence to: Chao Zhou at [chz212@lehigh.edu](mailto:chz212@lehigh.edu)

URL: <https://www.jove.com/video/59020>

DOI: [doi:10.3791/59020](https://doi.org/10.3791/59020)

## Materials

| Name                                                       | Company         | Catalog Number | Comments                                 |
|------------------------------------------------------------|-----------------|----------------|------------------------------------------|
| <b>Custom Spectral Domain OCT imaging system</b>           |                 |                | Developed in our lab                     |
| Superluminescent Diode (SLD)                               | <b>Thorlabs</b> | <b>SLD1325</b> | light source                             |
| 2×2 single mode fused fiber coupler, 50:50 splitting ratio | AC Photonics    | WP13500202B201 |                                          |
| <b>Reference Arm</b>                                       |                 |                |                                          |
| Lens Tube                                                  | <b>Thorlabs</b> |                |                                          |
| Adapter                                                    | <b>Thorlabs</b> |                |                                          |
| Collimating Lens                                           | Thorlabs        | AC080-020-C    |                                          |
| Focusing Lens                                              | Thorlabs        |                |                                          |
| Kinematic Mirror Mount                                     | Thorlabs        |                |                                          |
| Mirror                                                     | Thorlabs        |                |                                          |
| 1D Translational Stage                                     | Thorlabs        |                |                                          |
| Continuous neutral density filter                          | Thorlabs        |                |                                          |
| Pedestrial Post                                            | Thorlabs        |                |                                          |
| Clamping Fork                                              | Thorlabs        |                |                                          |
| <b>Sample Arm</b>                                          |                 |                |                                          |
| Lens Tube                                                  | Thorlabs        |                |                                          |
| Adapter                                                    | Thorlabs        |                |                                          |
| Collimating Lens                                           | Thorlabs        | AC080-020-C    |                                          |
| Galvanometer                                               | Thorlabs        |                |                                          |
| Relay Lens                                                 | Thorlabs        | AC254-100-C    | two Relay lens to make a telescope setup |
| Triangle Mirror Mount                                      | Thorlabs        |                |                                          |
| Mirror                                                     | Thorlabs        |                |                                          |
| Objective                                                  | Mitutoyo        |                |                                          |
| Pedestrial Post                                            | Thorlabs        |                |                                          |
| Clamping Fork                                              | Thorlabs        |                |                                          |
| Polarization Controller                                    | Thorlabs        |                |                                          |
| 30mm Cage Mount                                            | Thorlabs        |                |                                          |

|                                                                    |                                                       |                       |                                                                                    |
|--------------------------------------------------------------------|-------------------------------------------------------|-----------------------|------------------------------------------------------------------------------------|
| Cage Rod                                                           | Thorlabs                                              |                       |                                                                                    |
| <b>Stage</b>                                                       |                                                       |                       |                                                                                    |
| 3D motorized translation stage                                     | Beijing Mao Feng Optoelectronics Technology Co., Ltd. | JTH360XY              |                                                                                    |
| 2D Tilting Stage                                                   |                                                       |                       |                                                                                    |
| Rotation Stage                                                     |                                                       |                       |                                                                                    |
| Plate Holder                                                       |                                                       |                       | 3D printed                                                                         |
| <b>Spectrometer</b>                                                |                                                       |                       |                                                                                    |
| Lens Tube                                                          | Thorlabs                                              |                       |                                                                                    |
| Adapter                                                            | Thorlabs                                              |                       |                                                                                    |
| Collimating Lens                                                   | Thorlabs                                              | AC080-020-C           |                                                                                    |
| Grating                                                            | Wasatch                                               |                       | G = 1145 l/mm                                                                      |
| F-theta Lens                                                       | Thorlabs                                              | FTH-1064-100          |                                                                                    |
| InGaAs Line-scan Camera                                            | Sensor Unlimited                                      | SU1024-LDH2           |                                                                                    |
| <b>Name</b>                                                        | <b>Company</b>                                        | <b>Catalog Number</b> | <b>Comments</b>                                                                    |
| <b>Cell Culture Component</b>                                      |                                                       |                       |                                                                                    |
| HCT 116 Cell line                                                  | ATCC                                                  | CCL-247               |                                                                                    |
| Cell Culture Flask                                                 | SPL Life Sciences                                     | 70025                 |                                                                                    |
| Pipette                                                            | Fisherbrand                                           | 14388100              |                                                                                    |
| Pipette tips                                                       | Sorenson Bioscience                                   | 10340                 |                                                                                    |
| Gibco GlutaMax DMEM                                                | Thermo Fisher Scientific                              | 10569044              |                                                                                    |
| Fetal Bovine Serum, certified, US origin                           | Thermo Fisher Scientific                              | 16000044              |                                                                                    |
| Antibiotic-Antimycotic (100X)                                      | Thermo Fisher Scientific                              | 15240062              |                                                                                    |
| Corning 96-well Clear Round Bottom Ultra-Low Attachment Microplate | Corning                                               | 7007                  |                                                                                    |
| Gibco PBS, pH 7.4                                                  | Thermo Fisher Scientific                              | 10010023              |                                                                                    |
| Gibco Trypsin-EDTA (0.5%)                                          | Thermo Fisher Scientific                              | 15400054              |                                                                                    |
| Forma Series II 3110 Water-Jacketed CO2 Incubators                 | Thermo Fisher Scientific                              | 3120                  |                                                                                    |
| Gloves                                                             | VWR                                                   | 89428-750             |                                                                                    |
| Parafilm                                                           | Sigma-Aldrich                                         | P7793                 |                                                                                    |
| Transfer pipets                                                    | Globe Scientific                                      | 138080                |                                                                                    |
| Centrifuge                                                         | Eppendorf                                             | 5702 R                | To centrifuge the 15 mL tube                                                       |
| Centrifuge                                                         | NUAIRE                                                | AWEL CF 48-R          | To centrifuge the 96-well plate                                                    |
| Microscope                                                         | Olympus                                               |                       |                                                                                    |
| <b>Name</b>                                                        | <b>Company</b>                                        | <b>Catalog Number</b> | <b>Comments</b>                                                                    |
| <b>Histology &amp; IHC</b>                                         |                                                       |                       |                                                                                    |
| Digital slide scanner                                              | Leica                                                 | Aperio AT2            | Obtain high-resolution histological images                                         |
| Histology Service                                                  | Histowiz                                              |                       | Request service for histological and immunohistological staining of tumor spheroid |
| <b>Name</b>                                                        | <b>Company</b>                                        | <b>Catalog Number</b> | <b>Comments</b>                                                                    |
| <b>List of Commerical OCTs</b>                                     |                                                       |                       |                                                                                    |
| <b>SD-OCT system</b>                                               | Thorlabs                                              | Telesto Series        |                                                                                    |
| SD-OCT system                                                      | Wasatch Photonics                                     | WP OCT 1300 nm        |                                                                                    |

| Name                                     | Company                                               | Catalog Number | Comments                                                                                 |
|------------------------------------------|-------------------------------------------------------|----------------|------------------------------------------------------------------------------------------|
| <b>Software for Data Analyses</b>        |                                                       |                |                                                                                          |
| Basic Image Analysis                     | NIH                                                   | ImageJ         | Fiji also works.                                                                         |
| 3D Rendering                             | Thermo Fisher Scientific                              | Amira          | Commercial software. Option 1                                                            |
| 3D Rendering                             | Bitplane                                              | Imaris         | Commercial software. Option 2. Used in the protocol                                      |
| OCT acquisition software                 |                                                       |                | custom developed in C++.                                                                 |
| Stage Control                            | Beijing Mao Feng Optoelectronics Technology Co., Ltd. | MRC_3          | Incorporated into the custom OCT acquisition code                                        |
| OCT processing software                  |                                                       |                | custom developed in C++. Utilize GPU. Incorporated into the custom OCT acquisition code. |
| Morphological and Physiological Analysis |                                                       |                | custom developed in MATLAB                                                               |
